# Supplementary material
Source: publisher site journal article supplement (https://bdj.pensoft.net/lib/ajax_srv/article_elements_srv.php?action=download_suppl_file&instance_id=3278295)
Supplement: Supplementary file 1 [file article_elements_srv.php]

---

|                                              |                                                                                                                                                            |
|----------------------------------------------|------------------------------------------------------------------------------------------------------------------------------------------------------------|
| <b>Review Type / Type d'évaluation:</b>      | Reviewer 1 / Évaluateur 1                                                                                                                                  |
| <b>Name of Applicant / Nom du chercheur:</b> | Hammond,Chad                                                                                                                                               |
| <b>Application No. / Numéro de demande:</b>  | 359093                                                                                                                                                     |
| <b>Agency / Agence:</b>                      | CIHR/IRSC                                                                                                                                                  |
| <b>Competition / Concours:</b>               | Fellowship/Bourse de recherche                                                                                                                             |
| <b>Committee / Comité:</b>                   | Health Research Training A – Post-PhD (HTA)/Formation de recherche en santé A – Post-Ph.D. (HTA)                                                           |
| <b>Title / Titre:</b>                        | Widening the circle of care: An arts-based, participatory dialogue with stakeholders on cancer care for First Nations, Inuit, and Métis peoples in Ontario |

---

#### **Achievements and Activities of the Candidate/Réalisations et activités du candidat**

**Criterion/Critère:** Training Expectations/Attentes en matière de formation

**Rating/Cote:** O++

**Comments/Commentaires:** well written and clearly articulated

-good justification of why this location was chosen

-the objectives and training plans are clear.

**Criterion/Critère:** Proposed Research Project/Projet de recherche proposé

**Rating/Cote:** O+

**Comments/Commentaires:** very clearly justified and articulated. the methods are clear and appropriate.

**Criterion/Critère:** Honours, Awards and Academic Distinction/Prix, bourses et distinctions universitaires

**Rating/Cote:** G

**Comments/Commentaires:** a few minor awards / distinctions.

**Criterion/Critère:** Publications and Related Research Achievements/Publications et réalisations liées à la recherche

**Rating/Cote:** E

**Comments/Commentaires:** -they have 8 publications, 5 of which are first authored. Considering that they completed their PhD 2 years ago one would expect their number of publications to be higher.

#### **Sponsor's Assessment of the Candidate's Characteristics and Abilities/Évaluation par les répondants des caractéristiques et aptitudes du candidat**

**Criterion/Critère:** Sponsor's Assessment of the Candidate's Characteristics and Abilities/Évaluation par les répondants des caractéristiques et aptitudes du candidat

**Rating/Cote:** O+

**Comments/Commentaires:** very strong reference letters from supervisors that they've known for a long time.

#### **Research Training Environment/Milieu de formation en recherche**

**Criterion/Critère:** Research Training Environment/Milieu de formation en recherche

**Rating/Cote:** E+

**Comments/Commentaires:** -good justification of the training environment and supervisor.

-the supervisor is a CRC and has had a new investigator award and is relatively well funded.

-given the supervisor's stage of career and level of funding one would expect to see a higher number of trainees that she has supervised (mostly non-thesis based masters) and 4 PhDs (in progress)

---

|                                              |                                                                                                                                                            |
|----------------------------------------------|------------------------------------------------------------------------------------------------------------------------------------------------------------|
| <b>Review Type / Type d'évaluation:</b>      | Reviewer 1 / Évaluateur 1                                                                                                                                  |
| <b>Name of Applicant / Nom du chercheur:</b> | Hammond,Chad                                                                                                                                               |
| <b>Application No. / Numéro de demande:</b>  | 359093                                                                                                                                                     |
| <b>Agency / Agence:</b>                      | CIHR/IRSC                                                                                                                                                  |
| <b>Competition / Concours:</b>               | Fellowship/Bourse de recherche                                                                                                                             |
| <b>Committee / Comité:</b>                   | Health Research Training A – Post-PhD (HTA)/Formation de recherche en santé A – Post-Ph.D. (HTA)                                                           |
| <b>Title / Titre:</b>                        | Widening the circle of care: An arts-based, participatory dialogue with stakeholders on cancer care for First Nations, Inuit, and Métis peoples in Ontario |

---

-it is unclear why there are some publications listed where she is not an author.

-there is a limited number of senior author (trainee publications)

|                                              |                                                                                                                                                            |
|----------------------------------------------|------------------------------------------------------------------------------------------------------------------------------------------------------------|
| <b>Review Type / Type d'évaluation:</b>      | Reviewer 2 / Évaluateur 2                                                                                                                                  |
| <b>Name of Applicant / Nom du chercheur:</b> | Hammond, Chad                                                                                                                                              |
| <b>Application No. / Numéro de demande:</b>  | 359093                                                                                                                                                     |
| <b>Agency / Agence:</b>                      | CIHR/IRSC                                                                                                                                                  |
| <b>Competition / Concours:</b>               | Fellowship/Bourse de recherche                                                                                                                             |
| <b>Committee / Comité:</b>                   | Health Research Training A – Post-PhD (HTA)/Formation de recherche en santé A – Post-Ph.D. (HTA)                                                           |
| <b>Title / Titre:</b>                        | Widening the circle of care: An arts-based, participatory dialogue with stakeholders on cancer care for First Nations, Inuit, and Métis peoples in Ontario |

## Achievements and Activities of the Candidate/Réalisations et activités du candidat

**Criterion/Critère:** Training Expectations/Attentes en matière de formation

**Rating/Cote:** O++

**Comments/Commentaires:** The candidate's plans for a research career are clear and relevant to the proposed training and clearly describes the expectations from the training to achieve his goals.

**Criterion/Critère:** Proposed Research Project/Projet de recherche proposé

**Rating/Cote:** O+

**Comments/Commentaires:** The proposed research project is an adequate study according to the candidate's education, experience and interests. It includes the study objectives, methods, research plan, and study significance and impact on the candidate's learning experience and leadership as well as on cancer care challenges.

**Criterion/Critère:** Honours, Awards and Academic Distinction/Prix, bourses et distinctions universitaires

**Rating/Cote:** O++

**Comments/Commentaires:** The candidate has received an award as undergraduate student with the highest academic standing by the University of Saskatchewan; a distinction by the Canadian Psychological Association; and a New PI Award-CIHR & CCSRI Careers in Cancer Research Development Program during his postdoctoral fellowship. He had completed his studies in a short period of time (transferred to PhD without completing Master's degree) as a honour doctoral student. He has awarded two CIHR grants as PI and one as collaborator by the University of Ottawa.

**Criterion/Critère:** Publications and Related Research Achievements/Publications et réalisations liées à la recherche

**Rating/Cote:** O++

**Comments/Commentaires:** The candidate is quite productive at this stage of his career with seven (7) first-authored and two (2) co-author peer-reviewed publications in prestigious journals during doctoral studies and postdoctoral fellowship; more than 20 presentations in regional, national and international conferences and researcher meetings; one (1) first-authored book chapter; and five (5) book reviews. He is actively involved in community and volunteering activities regarding cancer care; participates in regional and national task forces in terms of cancer; and initiated research blogs on the same topic.

## Sponsor's Assessment of the Candidate's Characteristics and Abilities/Évaluation par les répondants des caractéristiques et aptitudes du candidat

**Criterion/Critère:** Sponsor's Assessment of the Candidate's Characteristics and Abilities/Évaluation par les répondants des caractéristiques et aptitudes du candidat

---

|                                              |                                                                                                                                                            |
|----------------------------------------------|------------------------------------------------------------------------------------------------------------------------------------------------------------|
| <b>Review Type / Type d'évaluation:</b>      | Reviewer 2 / Évaluateur 2                                                                                                                                  |
| <b>Name of Applicant / Nom du chercheur:</b> | Hammond,Chad                                                                                                                                               |
| <b>Application No. / Numéro de demande:</b>  | 359093                                                                                                                                                     |
| <b>Agency / Agence:</b>                      | CIHR/IRSC                                                                                                                                                  |
| <b>Competition / Concours:</b>               | Fellowship/Bourse de recherche                                                                                                                             |
| <b>Committee / Comité:</b>                   | Health Research Training A – Post-PhD (HTA)/Formation de recherche en santé A – Post-Ph.D. (HTA)                                                           |
| <b>Title / Titre:</b>                        | Widening the circle of care: An arts-based, participatory dialogue with stakeholders on cancer care for First Nations, Inuit, and Métis peoples in Ontario |

---

**Rating/Cote:** O++

**Comments/Commentaires:** All three sponsors describe the candidate as the best candidate for this postdoctoral fellowship. Their justifications of scores are aligned with the ratings. All comments are common across all three sponsors; none negative ones. The candidate has all the required characteristics and skills to become an independent investigator; He is an energetic and capable scholar with critical thinking skills, a curious and questioning personality with highly creative skills to develop new methods and approaches to study cancer care.

#### **Research Training Environment/Milieu de formation en recherche**

**Criterion/Critère:** Research Training Environment/Milieu de formation en recherche

**Rating/Cote:** O+

**Comments/Commentaires:** The candidate's supervisor (Dr. Thomas) has an excellent training, research experience, and publication record. Specifically, she currently holds four (4) grants and Canada Research Chair in Qualitative Health Research with Marginalized Populations. The research training environment seems to be excellent with resources and personal support for the candidate's successful postdoctoral fellowship.

|                                              |                                                                                                                                                            |
|----------------------------------------------|------------------------------------------------------------------------------------------------------------------------------------------------------------|
| <b>Review Type / Type d'évaluation:</b>      | Reviewer 3 / Évaluateur 3                                                                                                                                  |
| <b>Name of Applicant / Nom du chercheur:</b> | Hammond,Chad                                                                                                                                               |
| <b>Application No. / Numéro de demande:</b>  | 359093                                                                                                                                                     |
| <b>Agency / Agence:</b>                      | CIHR/IRSC                                                                                                                                                  |
| <b>Competition / Concours:</b>               | Fellowship/Bourse de recherche                                                                                                                             |
| <b>Committee / Comité:</b>                   | Health Research Training A – Post-PhD (HTA)/Formation de recherche en santé A – Post-Ph.D. (HTA)                                                           |
| <b>Title / Titre:</b>                        | Widening the circle of care: An arts-based, participatory dialogue with stakeholders on cancer care for First Nations, Inuit, and Métis peoples in Ontario |

#### **Achievements and Activities of the Candidate/Réalisations et activités du candidat**

**Criterion/Critère:** Training Expectations/Attentes en matière de formation

**Rating/Cote:** E

**Comments/Commentaires:** This candidate has reasonable training expectations; however, I question the strength/impact of his project i.e., 20 participants using arts based methods (photographs) to understand experiences of cancer care in First Nations, Inuit and Metis communities. Further justification of project and approach seems warranted. Publication record is emerging, with 4 first author papers. Has received CIHR funding as co-PI on a planning and dissemination grant (\$9,063). References are very strong. This is an emerging area of scholarship and this candidate has demonstrated leadership and clearly gained the respect of members of the research community in this area of scholarship. Supervisor is strongly funded; hence will offer a strong research environment for this candidate.

**Criterion/Critère:** Proposed Research Project/Projet de recherche proposé

**Rating/Cote:** G

**Comments/Commentaires:** .

**Criterion/Critère:** Honours, Awards and Academic Distinction/Prix, bourses et distinctions universitaires

**Rating/Cote:** G

**Comments/Commentaires:** .

**Criterion/Critère:** Publications and Related Research Achievements/Publications et réalisations liées à la recherche

**Rating/Cote:** G

**Comments/Commentaires:** .

#### **Sponsor's Assessment of the Candidate's Characteristics and Abilities/Évaluation par les répondants des caractéristiques et aptitudes du candidat**

**Criterion/Critère:** Sponsor's Assessment of the Candidate's Characteristics and Abilities/Évaluation par les répondants des caractéristiques et aptitudes du candidat

**Rating/Cote:** E+

**Comments/Commentaires:** .

#### **Research Training Environment/Milieu de formation en recherche**

**Criterion/Critère:** Research Training Environment/Milieu de formation en recherche

**Rating/Cote:** E+

**Comments/Commentaires:** .
